# Supplementary material
Source: Springer Nature journal article supplement (https://www.springermedizin.de/resource/supplementary/12889_2008_1437_MOESM8_ESM.pdf/9503866)

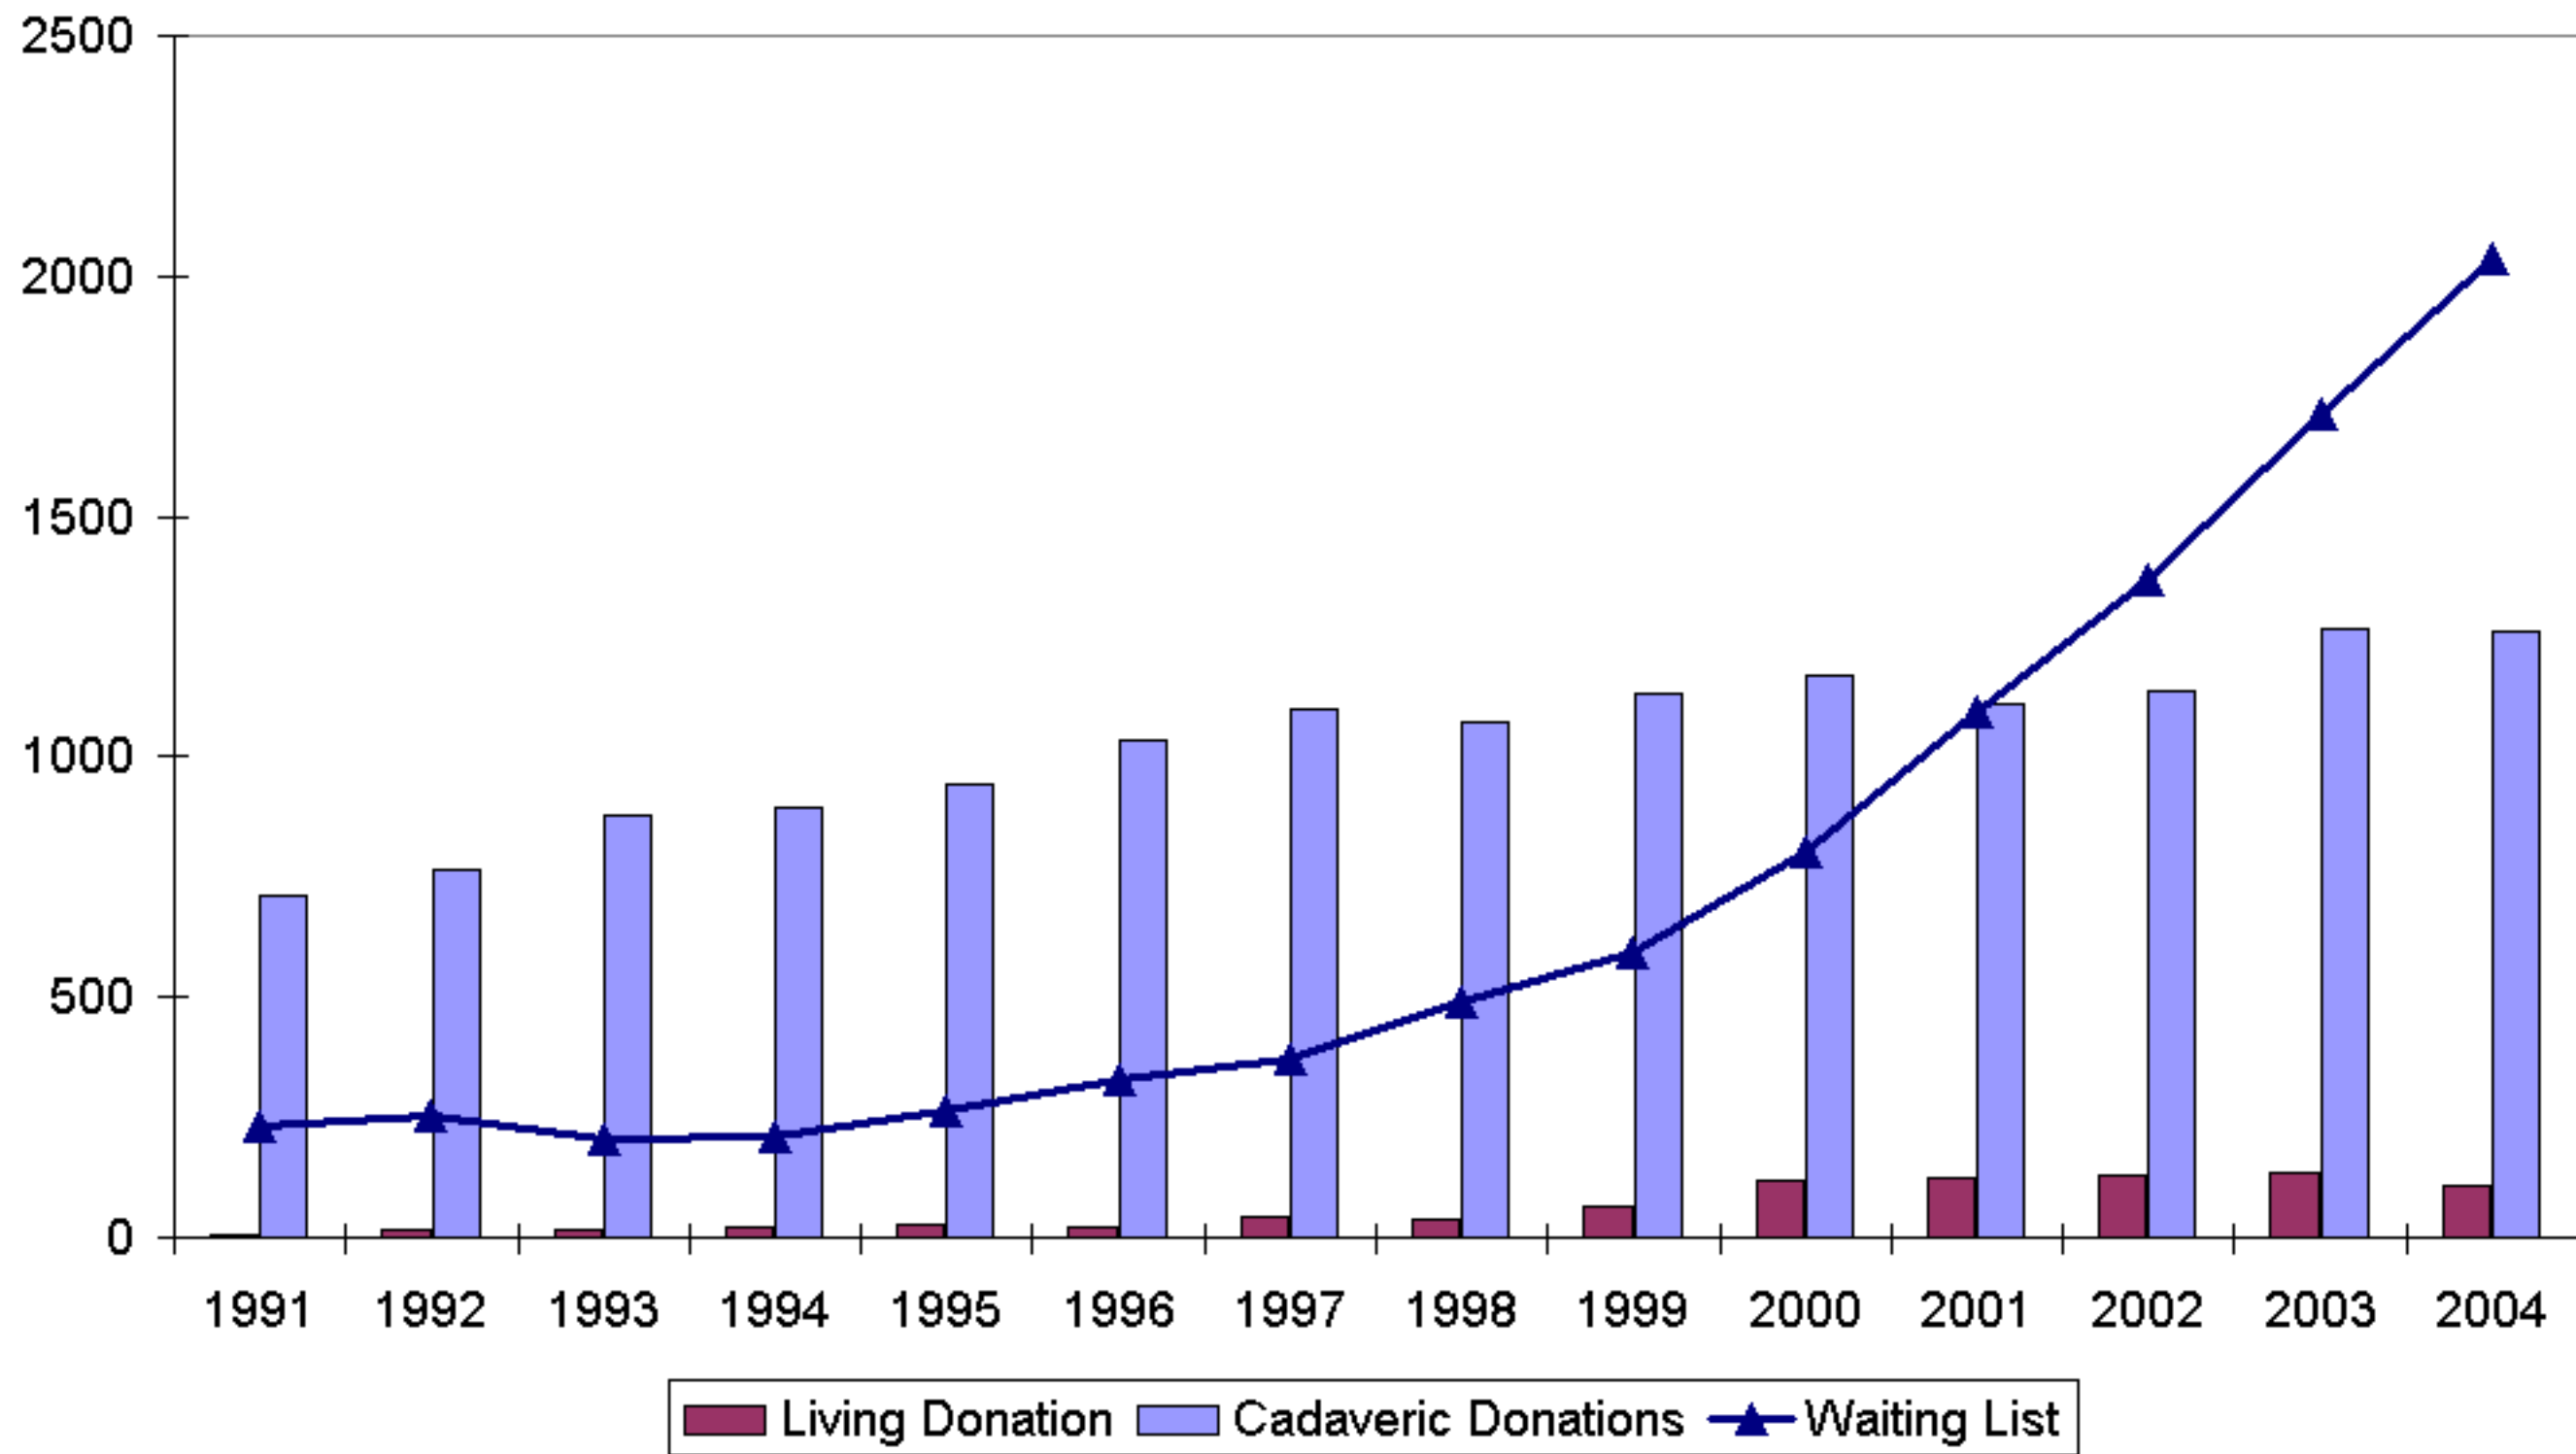

Supplement: MOESM8 [file 9503866]
